# Supplementary material
Source: HighWire-hosted journal article supplement (https://www.annfammed.org/highwire/filestream/16278/field_highwire_adjunct_files/0/Delpech-Supp.pdf)
Supplement: Delpech-Supp.pdf [file Delpech-Supp.pdf]

## Supplemental materials for

Delpech R, Le Neindre C, Panjo H, Rigal L. Presence of primary care physicians and patients' ability to register: a simulated-patient survey in the paris region. *Ann Fam Med.* 2023;21(4):341-343.

**Supplemental Figure 1.** Survey flow chart

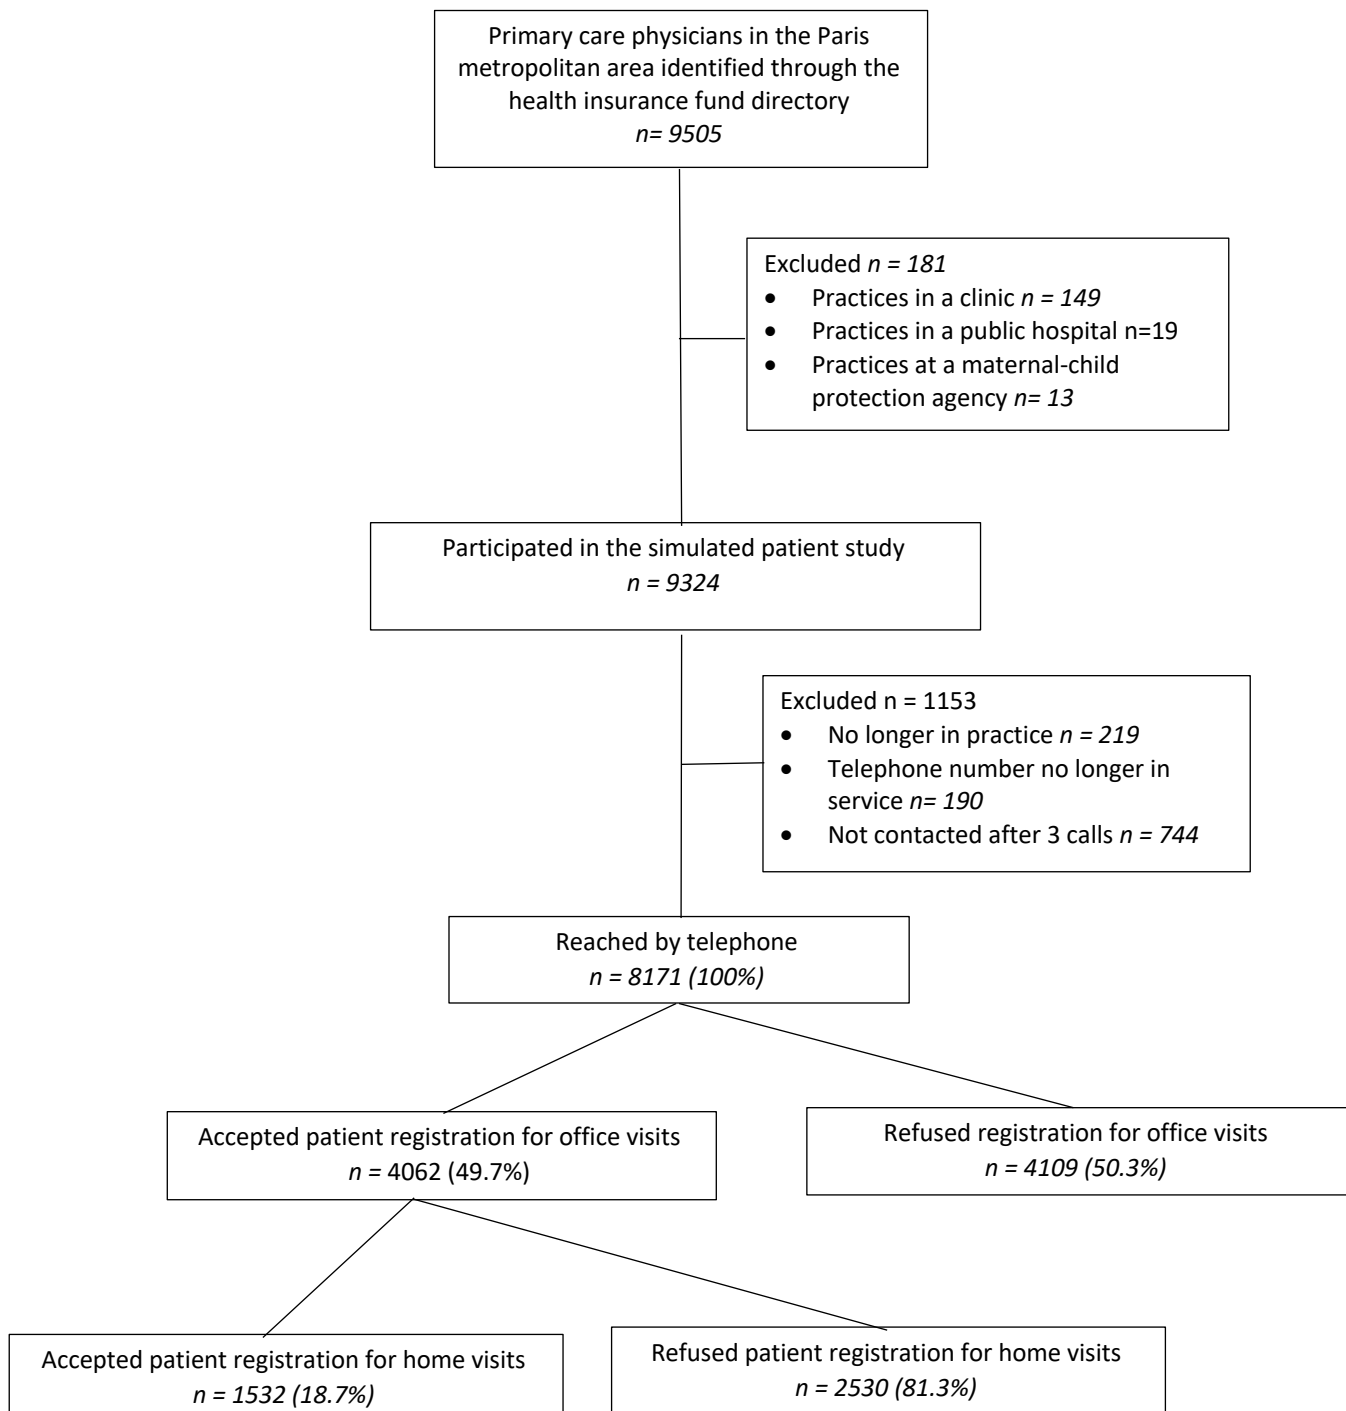

**Box S1.** Predefined scenario

- Interviewer: Hi, I just moved to the area and I'm looking for a new primary care physician. Do you accept new patients for registration?
- Respondent: yes/no
- Interviewer:
  - \* IF NO: *end of the conversation*
  - \* IF YES: And secondly, I wanted to know if you would also be willing to register my grandmother for home visits because she has a lot of mobility problems?
- Respondent: yes/no
- Interviewer: Thank you, I will get back to you when I need to. (*end of the conversation*)
